# Supplementary material
Source: MDPI journal article supplement (https://www.mdpi.com/2225-1154/11/4/84)
Supplement: s1 [file s1]

Supplementary Table 1: Minimum Temperature Results of the original and modified tests.

1

| Country      | Station          | Original Z | Corrected Zc | old P.value       | new P-value      | N/N*  | Tau   | Sen's slope | old.variance | new.variance |
|--------------|------------------|------------|--------------|-------------------|------------------|-------|-------|-------------|--------------|--------------|
| Mozambique   | Chimoio          | 5.92       | 5.92         | 0.00***           | 0.00***          | 1.00  | 0.51  | 0.02        | 29792.00     | 29792.00     |
|              | Monze            | -1.56      | -0.79        | 0.12              | 0.43             | 3.87  | -0.13 | 0.00        | 31199.00     | 120636.84    |
|              | Pemba            | -0.98      | -0.38        | 0.33              | 0.71             | 6.81  | -0.08 | -0.01       | 31200.00     | 212361.38    |
|              | Quelimane        | 1.11       | 0.71         | 0.27              | 0.48             | 2.45  | 0.09  | 0.00        | 31197.00     | 76527.19     |
|              | Rotanda          | -0.38      | NaN          | 0.70 <sup>c</sup> | NaN <sup>c</sup> | -0.09 | -0.03 | 0.00        | 23833.33     | -2117.30     |
|              | Sussundenga      | 3.45       | 4.11         | 0.00***           | 0.00***          | 0.70  | 0.29  | 0.01        | 30503.00     | 21431.57     |
| South Africa | Bethlehem        | 2.89       | 2.89         | 0.00***           | 0.00***          | 1.00  | 0.32  | 0.02        | 6832.67      | 6832.67      |
|              | Kimberley        | -3.31      | -3.31        | 0.00***           | 0.00***          | 1.00  | -0.37 | -0.03       | 6833.67      | 6833.67      |
|              | Levebu           | 0.47       | 0.47         | 0.64              | 0.64             | 1.00  | 0.05  | 0.00        | 6828.00      | 6828.00      |
|              | Nelspruit        | 2.32       | 2.32         | 0.02***           | 0.02***          | 1.00  | 0.26  | 0.01        | 6833.67      | 6833.67      |
|              | Pietermaritzburg | -0.21      | -0.21        | 0.84              | 0.84             | 1.00  | -0.02 | 0.00        | 6832.67      | 6832.67      |
|              | Polokwane        | 2.83       | 3.19         | 0.00***           | 0.00***          | 0.79  | 0.32  | 0.02        | 6833.67      | 5397.06      |
|              | Stellenbosch     | 3.15       | 1.84         | 0.00***           | 0.07             | 2.91  | 0.35  | 0.03        | 6833.67      | 19914.89     |
|              | Upington         | -4.43      | -2.61        | 0.00***           | 0.01***          | 2.87  | -0.50 | -0.08       | 6833.67      | 19634.50     |
|              | Vryburg          | 1.57       | 1.52         | 0.12              | 0.13             | 1.08  | 0.18  | 0.02        | 6833.67      | 7355.97      |
| Zimbabwe     | Harare           | -0.42      | -0.34        | 0.67              | 0.74             | 1.56  | -0.04 | 0.00        | 15158.33     | 23645.12     |
|              | Marondera        | 1.23       | 0.95         | 0.22              | 0.34             | 1.68  | 0.12  | 0.01        | 15158.33     | 25448.87     |
|              | Masvingo         | -0.39      | -0.31        | 0.70              | 0.76             | 1.61  | -0.04 | 0.00        | 15158.33     | 24426.28     |
|              | West Nicholson   | 3.14       | 2.16         | 0.00***           | 0.03***          | 2.10  | 0.30  | 0.02        | 15158.33     | 31829.28     |
| Malawi       | Chitala          | 0.70       | 0.60         | 0.49              | 0.55             | 1.32  | 0.07  | 0.00        | 16755.00     | 22195.65     |
|              | Chitedze         | 6.88       | 6.88         | 0.00***           | 0.00***          | 1.00  | 0.83  | 0.06        | 4550.33      | 4550.33      |
|              | Dedza            | -1.84      | -2.80        | 0.07              | 0.01***          | 0.43  | -0.20 | -0.01       | 8381.00      | 3608.19      |
|              | Golomoti         | 4.66       | 4.66         | 0.00***           | 0.00***          | 1.00  | 0.55  | 0.03        | 4958.33      | 4958.33      |
|              | Kandeu           | 6.08       | 3.45         | 0.00***           | 0.00***          | 3.11  | 0.66  | 0.04        | 7926.67      | 24617.64     |

Corrected Zc - Z statistic after variance Correction, new P.value - P-value after variance correction, N/N\* - Effective sample size, Original Z - Original Mann-Kendall Z statistic, Old P-value - Original Mann-Kendall p-value, Tau - Mann-Kendall's Tau, Sen's Slope - Sen's slope, old.variance - Old variance before variance Correction, new.variance - Variance after correction.

2

3

4

5

6

7

Supplementary Table 2: Maximum Temperature results of the original and modified tests.

| Country      | Site             | Original Z | Corrected Zc | Old P-value | New P-value | N/N* | Tau   | Sen's slope | Old Variance | New Variance |
|--------------|------------------|------------|--------------|-------------|-------------|------|-------|-------------|--------------|--------------|
| Mozambique   | Chimoio          | 2.46       | 1.59         | 0.01***     | 0.11        | 2.41 | 0.21  | 0.01        | 31200.00     | 75132.17     |
|              | Monze            | 0.36       | 0.21         | 0.72        | 0.83        | 2.96 | 0.03  | 0.00        | 31199.00     | 92195.74     |
|              | Pemba            | -3.01      | -1.40        | 0.00***     | 0.16        | 4.58 | -0.26 | -0.01       | 31200.00     | 142997.20    |
|              | Quelimane        | 2.38       | 2.13         | 0.02***     | 0.03***     | 1.25 | 0.20  | 0.01        | 31197.00     | 38998.46     |
|              | Rotanda          | -0.11      | -0.08        | 0.91        | 0.93        | 1.74 | -0.01 | 0.00        | 23833.33     | 41584.53     |
|              | Sussundenga      | -1.04      | -0.65        | 0.30        | 0.51        | 2.52 | -0.09 | 0.00        | 30502.00     | 77011.06     |
| South Africa | Bethlehem        | 2.64       | 2.10         | 0.01***     | 0.04***     | 1.58 | 0.30  | 0.04        | 6833.67      | 10809.13     |
|              | Kimberley        | 3.70       | 3.70         | 0.00***     | 0.00***     | 1.00 | 0.41  | 0.04        | 6833.67      | 6833.67      |
|              | Levebu           | 0.93       | 1.59         | 0.35        | 0.11        | 0.34 | 0.11  | 0.00        | 6830.67      | 2335.90      |
|              | Nelspruit        | 3.56       | 3.56         | 0.00***     | 0.00***     | 1.00 | 0.40  | 0.04        | 6833.67      | 6833.67      |
|              | Pietermaritzburg | 3.30       | 3.19         | 0.00***     | 0.00***     | 1.07 | 0.37  | 0.04        | 6832.67      | 7334.63      |
|              | Polokwane        | 3.87       | 2.22         | 0.00***     | 0.03***     | 3.05 | 0.43  | 0.09        | 6833.67      | 20861.76     |
|              | Stellenbosch     | 5.99       | 5.99         | 0.00***     | 0.00***     | 1.00 | 0.67  | 0.07        | 6832.67      | 6832.67      |
|              | Upington         | 4.84       | 2.84         | 0.00***     | 0.00***     | 2.89 | 0.54  | 0.06        | 6833.67      | 19773.30     |
|              | Vryburg          | 5.49       | 3.26         | 0.00***     | 0.00***     | 2.83 | 0.61  | 0.08        | 6833.67      | 19365.62     |
| Zimbabwe     | Harare           | -0.18      | -0.18        | 0.86        | 0.86        | 1.00 | -0.02 | 0.00        | 15158.33     | 15158.33     |
|              | Marondera        | 2.29       | 2.15         | 0.02***     | 0.03***     | 1.14 | 0.22  | 0.02        | 15158.33     | 17283.94     |
|              | Masvingo         | 2.31       | 2.31         | 0.02***     | 0.02***     | 1.00 | 0.22  | 0.01        | 15158.33     | 15158.33     |
|              | West Nicholson   | 3.74       | 3.03         | 0.00***     | 0.00***     | 1.53 | 0.36  | 0.03        | 15157.33     | 23174.85     |
| Malawi       | Chitala          | -0.93      | -0.68        | 0.35        | 0.50        | 1.85 | -0.09 | 0.00        | 16755.00     | 31049.67     |
|              | Chitedze         | 1.75       | 1.75         | 0.08        | 0.08        | 1.00 | 0.21  | 0.02        | 4550.33      | 4550.33      |
|              | Dedza            | 0.22       | 0.16         | 0.83        | 0.88        | 1.97 | 0.02  | 0.00        | 8381.00      | 16516.31     |
|              | Golomoti         | 2.76       | 2.76         | 0.01***     | 0.01***     | 1.00 | 0.33  | 0.03        | 4958.33      | 4958.33      |
|              | Kandeu           | 1.43       | 1.54         | 0.15        | 0.12        | 0.85 | 0.16  | 0.01        | 7926.67      | 6764.05      |

Values significant at the 5 % level are indicated by “\*\*\*”,

Corrected Zc - Z statistic after variance Correction, new P.value - P-value after variance correction, N/N\* - Effective sample size, Original Z - Original Mann-Kendall Z statistic, Old P-value - Original Mann-Kendall p-value, Tau - Mann-Kendall's Tau, Sen's Slope - Sen's slope, old.variance - Old variance before variance Correction, new.variance - Variance after correction.
